# Supplementary material for: Estimating genomic diversity and population differentiation – an empirical comparison of microsatellite and SNP variation in Arabidopsis halleri
Source: PubMed Central journal article supplement (PMC5225627; doi:10.1186/s12864-016-3459-7), 2017-01-11
Supplement: 12864_2016_3459_MOESM1_ESM.pdf [file 12864_2016_3459_MOESM1_ESM.pdf]

**Additional file 1: Table S1** Sampling locations of the nine study populations of *Arabidopsis halleri*.

| Population           | Location              | Longitude<br>[E] | Latitude<br>[N] | Altitude<br>[m a.s.l.] | Sampling<br>year |
|----------------------|-----------------------|------------------|-----------------|------------------------|------------------|
| Aha09 <sup>1</sup>   | Vicosoprano (CH)      | 9°39'31.3"       | 46°22'9.3"      | 1403                   | 2010             |
| Aha11 <sup>1,2</sup> | Brusio (CH)           | 10°6'22.0"       | 46°16'39.0"     | 1070                   | 2010             |
| Aha18 <sup>2</sup>   | Chironico (CH)        | 8°49'33.8"       | 46°24'57.4"     | 850                    | 2010             |
| Aha19 <sup>1</sup>   | Poschiavo (CH)        | 10°1'21.2"       | 46°24'40.5"     | 2308                   | 2010             |
| Aha21 <sup>1</sup>   | Vicosoprano (CH)      | 9°37'51.0"       | 46°22'0.6"      | 1610                   | 2011             |
| Aha31 <sup>1,2</sup> | Castasegna (CH)       | 9°31'18.2"       | 46°20'12.5"     | 790                    | 2011             |
| AhaN1                | Brusio (CH)           | 10°6'2.7"        | 46°16'31.1"     | 987                    | 2012             |
| AhaN3                | St. Moritz (CH)       | 9°49'38.4"       | 46°29'57.3"     | 2068                   | 2012             |
| AhaN4                | Passo di Foscagno (I) | 10°13'20.2"      | 46°29'28.1"     | 2155                   | 2012             |

<sup>1</sup> Samples also used in Fischer *et al.* [1]

<sup>2</sup> Samples also used in Rellstab *et al.* [2]

## REFERENCES

1. Fischer MC, Rellstab C, Tedder A, Zoller S, Gugerli F, Shimizu KK, Holderegger R, Widmer A. Population genomic footprints of selection and associations with climate in natural populations of *Arabidopsis halleri* from the Alps. *Mol Ecol.* 2013;22:5594-607.
2. Rellstab C, Zoller S, Tedder A, Gugerli F, Fischer MC. Validation of SNP allele frequencies determined by pooled next-generation sequencing in natural populations of a non-model plant species. *PLoS One.* 2013;8:e80422.
