# Supplementary material for: Estimating genomic diversity and population differentiation – an empirical comparison of microsatellite and SNP variation in Arabidopsis halleri
Source: PubMed Central journal article supplement (PMC5225627; doi:10.1186/s12864-016-3459-7), 2017-01-11
Supplement: 12864_2016_3459_MOESM2_ESM.pdf [file 12864_2016_3459_MOESM2_ESM.pdf]

**Additional file 2: Table S2** Characteristics of 20 microsatellite markers used for *Arabidopsis halleri*. Source refers to the species for which a microsatellite marker was originally developed. Sequences of forward and reverse primers are shown in 5' - 3' direction. The fluorescent dyes used in multiplex PCRs and allele size ranges in base pairs are given for each locus.

| Multiplex set | Locus               | Source             | Original reference | Forward primer              | Reverse primer              | Dye <sup>1</sup> | Allele range |
|---------------|---------------------|--------------------|--------------------|-----------------------------|-----------------------------|------------------|--------------|
| A             | AthZFPG             | <i>A. thaliana</i> | [1]                | TTGCGTTTCCACATTTGTTT        | TGGGTCAATTCACATGTTGAGA*     | 565              | 140-153      |
| A             | F19K23-483          | <i>A. thaliana</i> | [1]                | GGTCTGATTGCCGTTGTTGC        | GATTTCTGTAACATCCCATTTCC*    | YY               | 185-189      |
| A             | ICE13               | <i>A. thaliana</i> | [1]                | GATCCTTCACCGGGTCTTG         | GTGGTGGAGACTCTTCGAGC        | 550              | 226-253      |
| A             | MHJ24               | <i>A. thaliana</i> | [1]                | CCGTCCCTTGATCCTTGAGATTCTGAG | CAATTCGAAAATCATATTCATGCACC  | 550              | 130-138      |
| A             | nga162              | <i>A. thaliana</i> | [2]                | CATGCAATTTGCATCTGAGG        | CTCTGTCACTCTTTTCTTCTGG*     | YY               | 78-80        |
| A             | nga361              | <i>A. thaliana</i> | [3]                | AGGGTTTTCCCAAAGAGATGA       | TCTTGTCCTTTGATTTTAGACCA*    | FAM              | 125-145      |
| B             | AthCDPK9            | <i>A. thaliana</i> | [1]                | ATCAATCATTGTCCAAACTTG*      | GAAACTGACTTGAAGAAGGCA*      | FAM              | 87-89        |
| B             | ICE10 <sup>#</sup>  | <i>A. thaliana</i> | [1]                | GACTCTTATGGGTAAGCTCCTTG     | AACCTCCACAAGTTTCTAAAACAATC* | 550              | 127-141      |
| B             | ICE11               | <i>A. thaliana</i> | [1]                | TTTCAAGTTGAGAAGTGGAGTG      | AAGATTAGACAGAGTTTAGTGGTC*   | 565              | 147-149      |
| B             | ICE2 <sup>#</sup>   | <i>A. thaliana</i> | [1]                | GCTACCAGATCCGATGGTAAGATG    | CTCGAGTCAAAAATTAGGGTTTCG*   | YY               | 136-137      |
| B             | ICE5                | <i>A. thaliana</i> | [1]                | CTTGCAACCGCCAACCTCAATCG     | CTTGTCTCGCTCCCGCACG*        | FAM              | 170-171      |
| B             | nga111 <sup>#</sup> | <i>A. thaliana</i> | [2]                | TGTTTTTTTAGGACAAATGGCG      | CTGCAGTTGGAAGCTAAAGGG*      | YY               | 105-125      |
| C             | ah15                | <i>A. halleri</i>  | [4]                | CCAGGAAAGGCAAATCAAGA        | AGGGACGCACGATTTTAGTG        | NED              | 146-154      |
| C             | ah22                | <i>A. halleri</i>  | [4]                | CCAGTTTCGATTTGTTTTACTTTG    | AGTTGTGTGATGTAATAAGGTGAAAT  | PET              | 166-177      |
| C             | ah27                | <i>A. halleri</i>  | [4]                | TTTTTGCGTTTATCATGTCA        | CGATGGTCCACGAATAATTG        | FAM              | 240-246      |
| C             | ah44                | <i>A. halleri</i>  | [4]                | AGCCCTAGCATCTCCTTTCA        | TCGTGTTTGTGCTTGAGTTTG       | VIC              | 83-115       |
| C             | ah49                | <i>A. halleri</i>  | [4]                | CGCCACCTCTCTGTAAATC         | GAGAACAATGTTGAATTGATTGC     | NED              | 59-71        |
| C             | ah59 <sup>†</sup>   | <i>A. halleri</i>  | [4]                | GGAAGCAATACTGGGGAAGC        | AAAAACCTTAGCCCTTTTGG        | VIC              | 169-191      |
| C             | ah79                | <i>A. halleri</i>  | [4]                | TGCATTGTGTTGTGTTTCTGC       | TCACATGACGCAATATGCAC        | PET              | 82-90        |
| C             | ah89                | <i>A. halleri</i>  | [4]                | TCCAACACAAGGGGAAAGTC        | CCAACCTTGCGAGTTGATTC        | PET              | 235-261      |

<sup>1</sup>Used fluorescent dyes (565 for ATTO 565, 550 for ATTO 550, and YY for Yakima Yellow)

<sup>#</sup>Forward and reverse primers were switched compared to the original reference

\*Primer sequence was adapted according to own draft genome of *A. halleri* [5] to increase amplification success

<sup>†</sup> Excluded from final analyses as a consequence of high proportion of null alleles

## REFERENCES

1. Clauss MJ, Cobban H, Mitchell-Olds T. Cross-species microsatellite markers for elucidating population genetic structure in *Arabidopsis* and *Arabis* (Brassicaceae). *Mol Ecol.* 2002;11:591-601.
2. Bell CJ, Ecker JR. Assignment of 30 microsatellite loci to the linkage of *Arabidopsis*. *Genomics.* 1994;19:137-44.
3. Llaurens V, Castric V, Austerlitz F, Vekemans X. High paternal diversity in the self-incompatible herb *Arabidopsis halleri* despite clonal reproduction and spatially restricted pollen dispersal. *Mol Ecol.* 2008;17:1577-88.
4. Godé C, Decombeix I, Kostecka A, Wasowicz P, Pauwels M, Courseaux A, Saumitou-Laprade P. Nuclear microsatellite loci for *Arabidopsis halleri* (Brassicaceae), a model species to study plant adaptation to heavy metals. *Am J Bot.* 2012;99:e49-52.
5. Rellstab C, Zoller S, Tedder A, Gugerli F, Fischer MC. Validation of SNP allele frequencies determined by pooled next-generation sequencing in natural populations of a non-model plant species. *PLoS One.* 2013;8:e80422.
