# Supplementary material for: Estimating genomic diversity and population differentiation – an empirical comparison of microsatellite and SNP variation in Arabidopsis halleri
Source: PubMed Central journal article supplement (PMC5225627; doi:10.1186/s12864-016-3459-7), 2017-01-11
Supplement: 12864_2016_3459_MOESM4_ESM.pdf [file 12864_2016_3459_MOESM4_ESM.pdf]

**Additional file 4: Table S3** Locus-specific summary statistics for all 20 microsatellite markers genotyped in *Arabidopsis halleri*. Estimated frequency of null alleles, total number of alleles found among the 180 individuals, expected heterozygosity (SSR- $H_e$ ), and inbreeding coefficient  $F_{IS}$  with one-sided  $p$ -value (significant heterozygote deficiency indicated in bold) are given.

| Name              | Null alleles [%] | No. of alleles | <sup>1</sup> SSR- $H_e$ | $F_{IS}$ | $F_{IS}$ one-sided $p$ -value |
|-------------------|------------------|----------------|-------------------------|----------|-------------------------------|
| <i>AthZFPG</i>    | 2.4              | 8              | 0.537                   | -0.010   | 0.562                         |
| <i>F19K23-483</i> | 0.4              | 4              | 0.476                   | -0.077   | 0.139                         |
| <i>ICE13</i>      | 0.7              | 6              | 0.416                   | -0.029   | 0.319                         |
| <i>MHJ24</i>      | 3.4              | 4              | 0.472                   | 0.023    | 0.311                         |
| <i>nga162</i>     | 3.4              | 2              | 0.358                   | -0.024   | 0.434                         |
| <i>nga361</i>     | 5.2              | 5              | 0.520                   | 0.145    | 0.014                         |
| <i>AthCDPK9</i>   | 1.2              | 2              | 0.032                   | 0.295    | 0.135                         |
| <i>ICE10</i>      | 6.1              | 3              | 0.401                   | 0.187    | 0.011                         |
| <i>ICE11</i>      | 0.5              | 2              | 0.039                   | 0.136    | 0.467                         |
| <i>ICE2</i>       | 0.1              | 2              | 0.025                   | -0.118   | 0.758                         |
| <i>ICE5</i>       | 0.2              | 2              | 0.226                   | -0.080   | 0.297                         |
| <i>nga111</i>     | 0.2              | 2              | 0.059                   | 0.059    | 0.589                         |
| <i>ah15</i>       | 3.8              | 5              | 0.503                   | 0.084    | 0.059                         |
| <i>ah22</i>       | 2.2              | 9              | 0.717                   | 0.001    | 0.413                         |
| <i>ah27</i>       | 0.8              | 4              | 0.515                   | -0.013   | 0.459                         |
| <i>ah44</i>       | 3.6              | 7              | 0.553                   | 0.096    | 0.038                         |
| <i>ah49</i>       | 5.3              | 7              | 0.503                   | 0.138    | 0.017                         |
| <i>ah59*</i>      | 10.0             | 7              | 0.508                   | 0.170    | <b>0.001</b>                  |
| <i>ah79</i>       | 4.5              | 4              | 0.485                   | 0.084    | 0.096                         |
| <i>ah89</i>       | 2.9              | 5              | 0.538                   | 0.070    | 0.137                         |

<sup>1</sup> SSR- $H_e$  for single loci was calculated with GENODIVE [1]

\* excluded from further analyses

## REFERENCES

1. Meirmans PG, Van Tienderen PH. GenoType and GenoDive: two programs for the analysis of genetic diversity of asexual organisms. *Mol Ecol Notes*. 2004;4:792-4.
