# Supplementary material for: Estimating genomic diversity and population differentiation – an empirical comparison of microsatellite and SNP variation in Arabidopsis halleri
Source: PubMed Central journal article supplement (PMC5225627; doi:10.1186/s12864-016-3459-7), 2017-01-11

**Additional file 5: Figure S1** (A) Population specific allele frequency distributions in nine populations of *A. halleri* for 19 microsatellite markers (blue). (B) Minor allele frequency distributions in the same nine populations across 2,064,681 SNPs (green). Histograms are labelled with population codes (Additional file 1: Table S1).

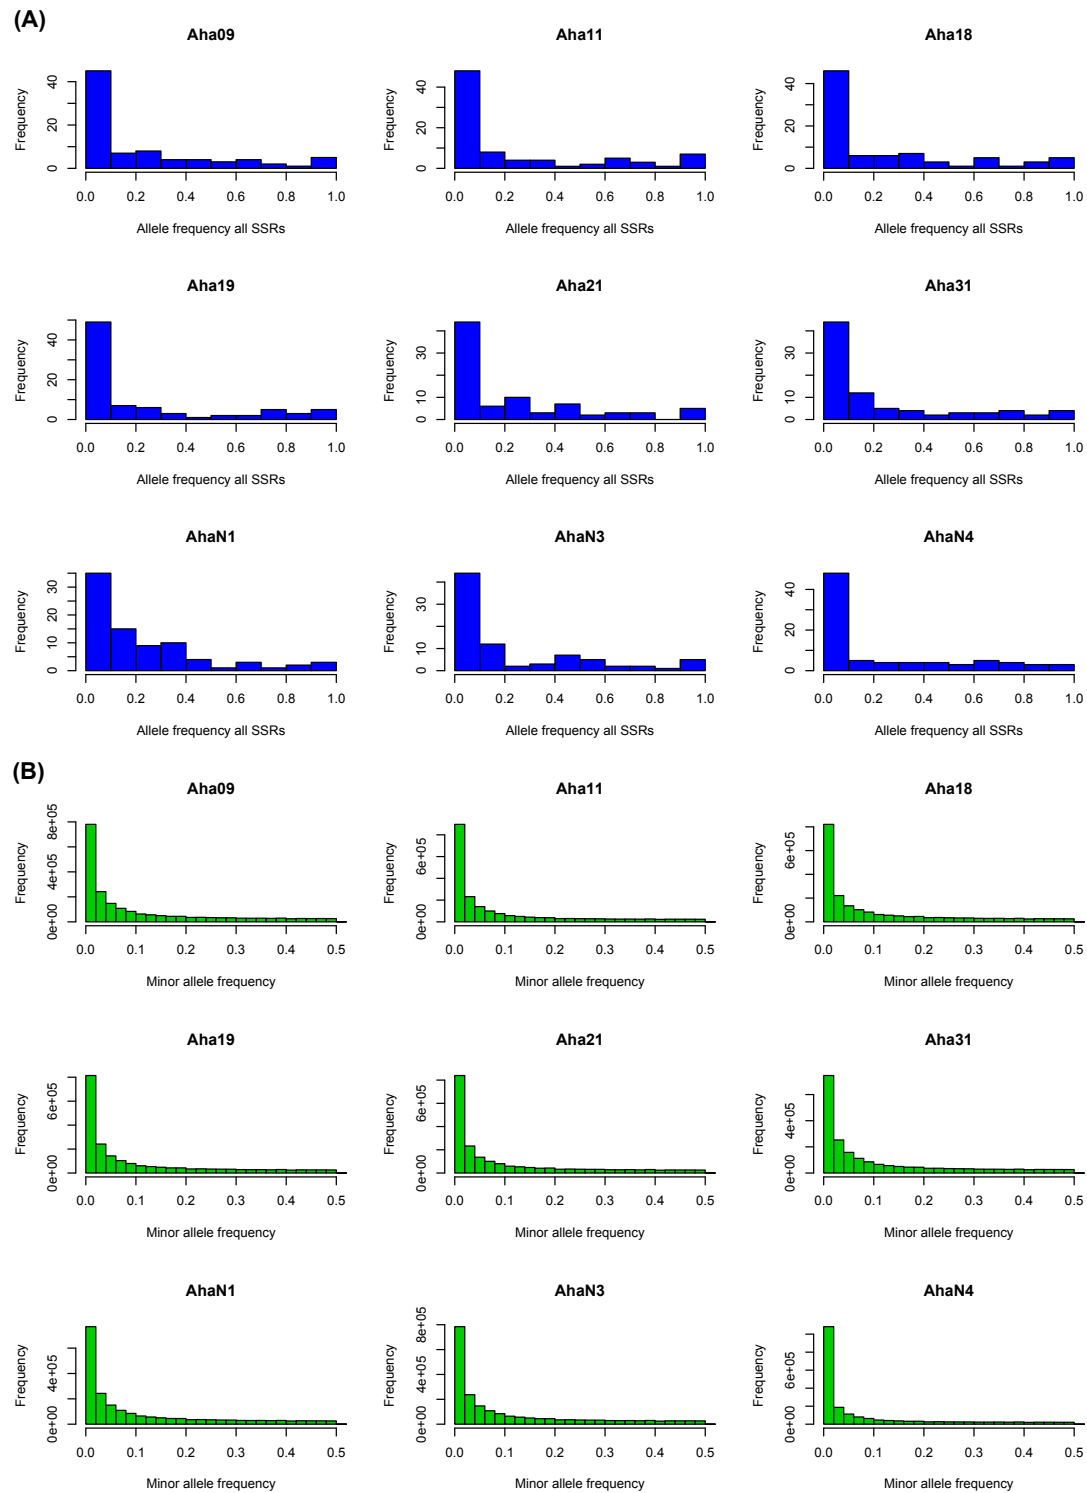

Supplement: 12864_2016_3459_MOESM5_ESM.pdf [file 12864_2016_3459_MOESM5_ESM.pdf]
