# Supplementary material for: Estimating genomic diversity and population differentiation – an empirical comparison of microsatellite and SNP variation in Arabidopsis halleri
Source: PubMed Central journal article supplement (PMC5225627; doi:10.1186/s12864-016-3459-7), 2017-01-11
Supplement: 12864_2016_3459_MOESM6_ESM.pdf [file 12864_2016_3459_MOESM6_ESM.pdf]

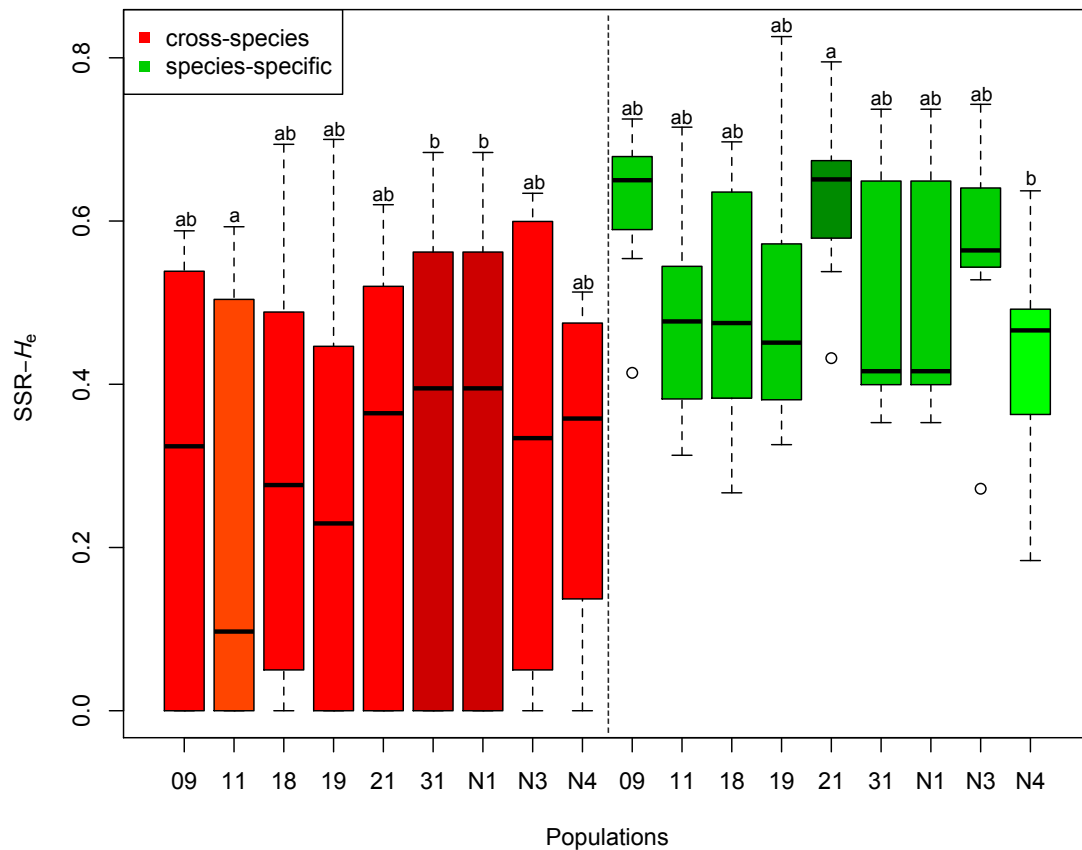

**Additional file 6: Figure S2** Box-whisker plot of expected heterozygosity calculated for each microsatellite marker ( $SSR-H_e$ ) genotyped in *Arabidopsis halleri*. For cross-species microsatellites (left, red), no significantly different estimates of  $H_e$  (pairwise Wilcoxon signed-rank test) were observed after Bonferroni correction, as a consequence of the high variance. Without correction for multiple testing, only population Aha11 had a significantly different  $H_e$  estimates from Aha31 and AhaN1 (indicated with different colouring and letters). For species-specific markers (right, green), no significant differences in  $H_e$  estimates were observed after Bonferroni correction. Without multiple corrections, only Aha21 was significantly different from AhaN4.
