# Supplementary material for: Estimating genomic diversity and population differentiation – an empirical comparison of microsatellite and SNP variation in Arabidopsis halleri
Source: PubMed Central journal article supplement (PMC5225627; doi:10.1186/s12864-016-3459-7), 2017-01-11
Supplement: 12864_2016_3459_MOESM7_ESM.pdf [file 12864_2016_3459_MOESM7_ESM.pdf]

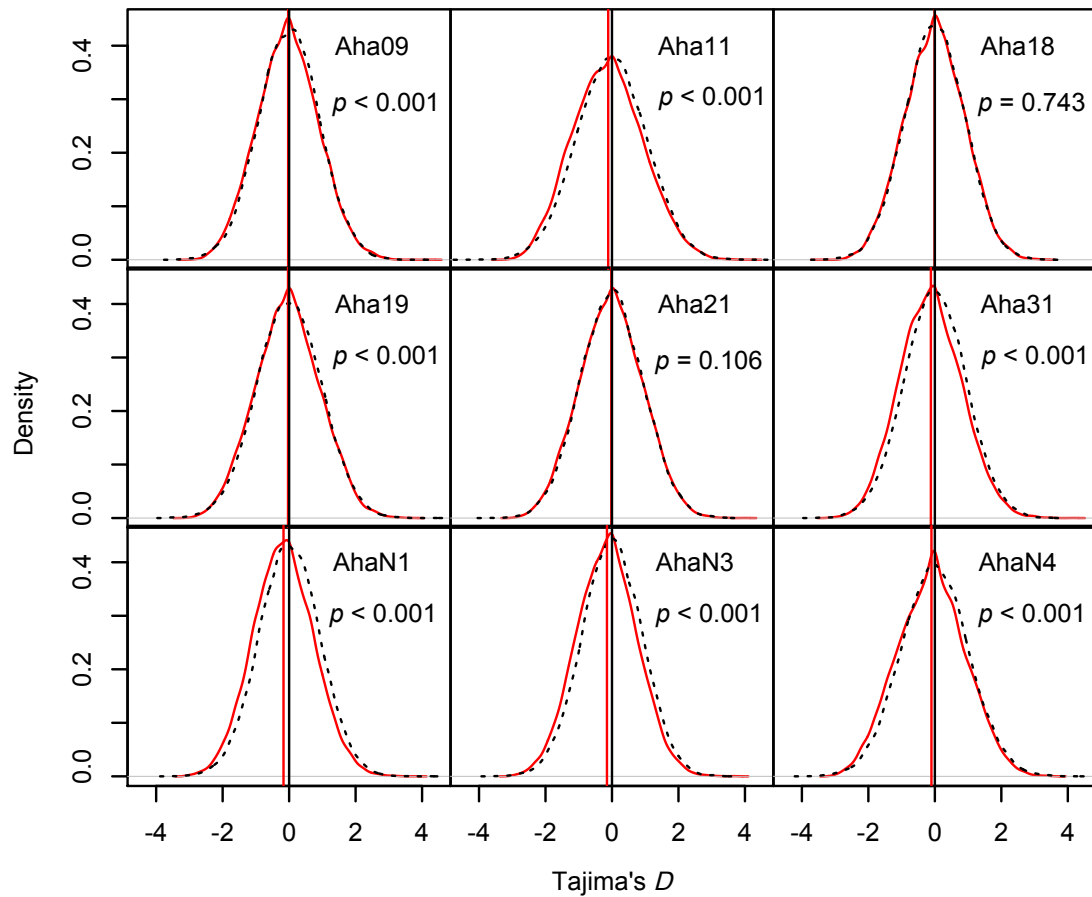

**Additional file 7: Figure S3** Observed (solid red lines) versus expected (dotted black lines) distributions of Tajima's  $D$  for nine populations of *Arabidopsis halleri*. The expected normal distribution consists of 22,210 values with an average of zero and the same standard deviation as the real dataset.  $P$ -values indicate whether there was a significant deviation of the average from zero using a  $t$ -test.
