# Supplementary material for: Estimating genomic diversity and population differentiation – an empirical comparison of microsatellite and SNP variation in Arabidopsis halleri
Source: PubMed Central journal article supplement (PMC5225627; doi:10.1186/s12864-016-3459-7), 2017-01-11
Supplement: 12864_2016_3459_MOESM8_ESM.pdf [file 12864_2016_3459_MOESM8_ESM.pdf]

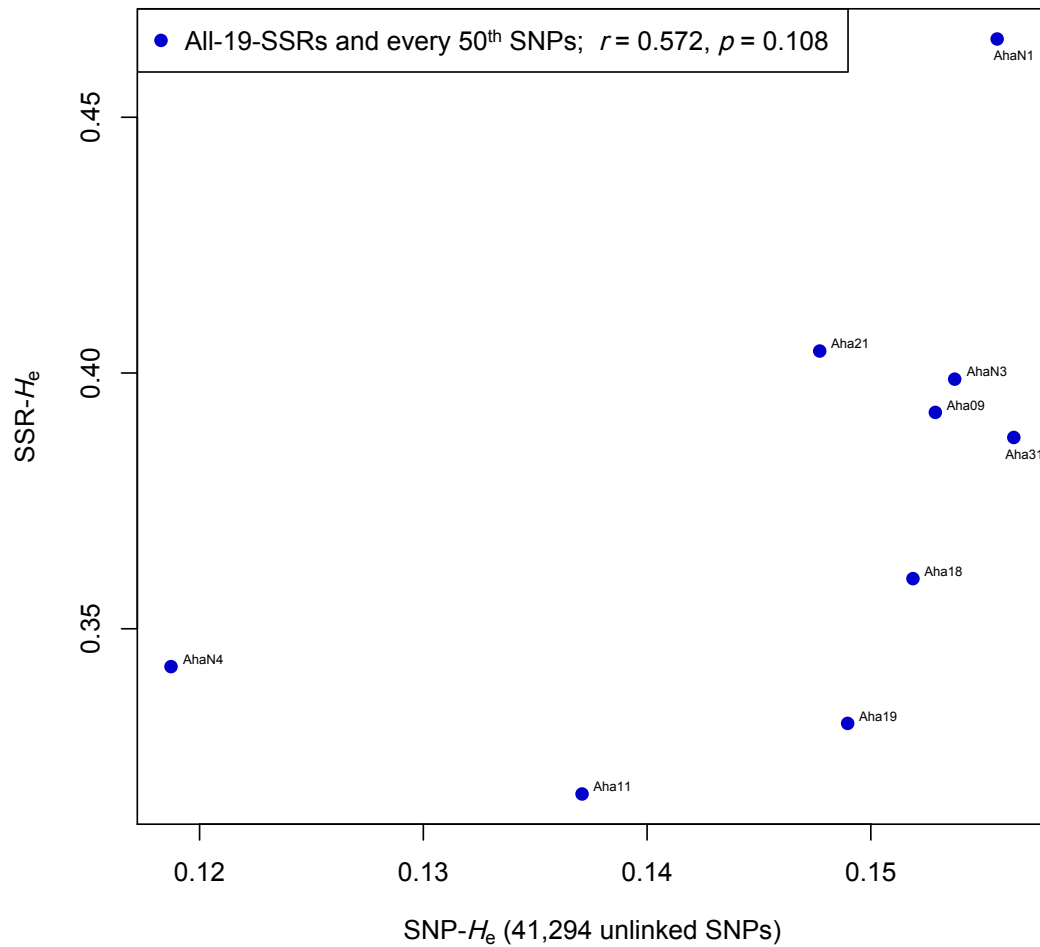

**Additional file 8: Figure S4** Relationships between expected SNP heterozygosity (SNP- $H_e$ ) and expected microsatellite heterozygosity (SSR- $H_e$ ) of *Arabidopsis halleri* estimated on the basis of 19 microsatellites and 41,294 genetically unlinked genome-wide single nucleotide polymorphisms (SNPs). For this analysis only every 50<sup>th</sup> SNP of the more than 2 million SNPs was used. The median distance among two neighbouring SNPs is 1600 bp on the *A. thaliana* reference genome.
