# Supplementary material for: Estimating genomic diversity and population differentiation – an empirical comparison of microsatellite and SNP variation in Arabidopsis halleri
Source: PubMed Central journal article supplement (PMC5225627; doi:10.1186/s12864-016-3459-7), 2017-01-11
Supplement: 12864_2016_3459_MOESM10_ESM.pdf [file 12864_2016_3459_MOESM10_ESM.pdf]

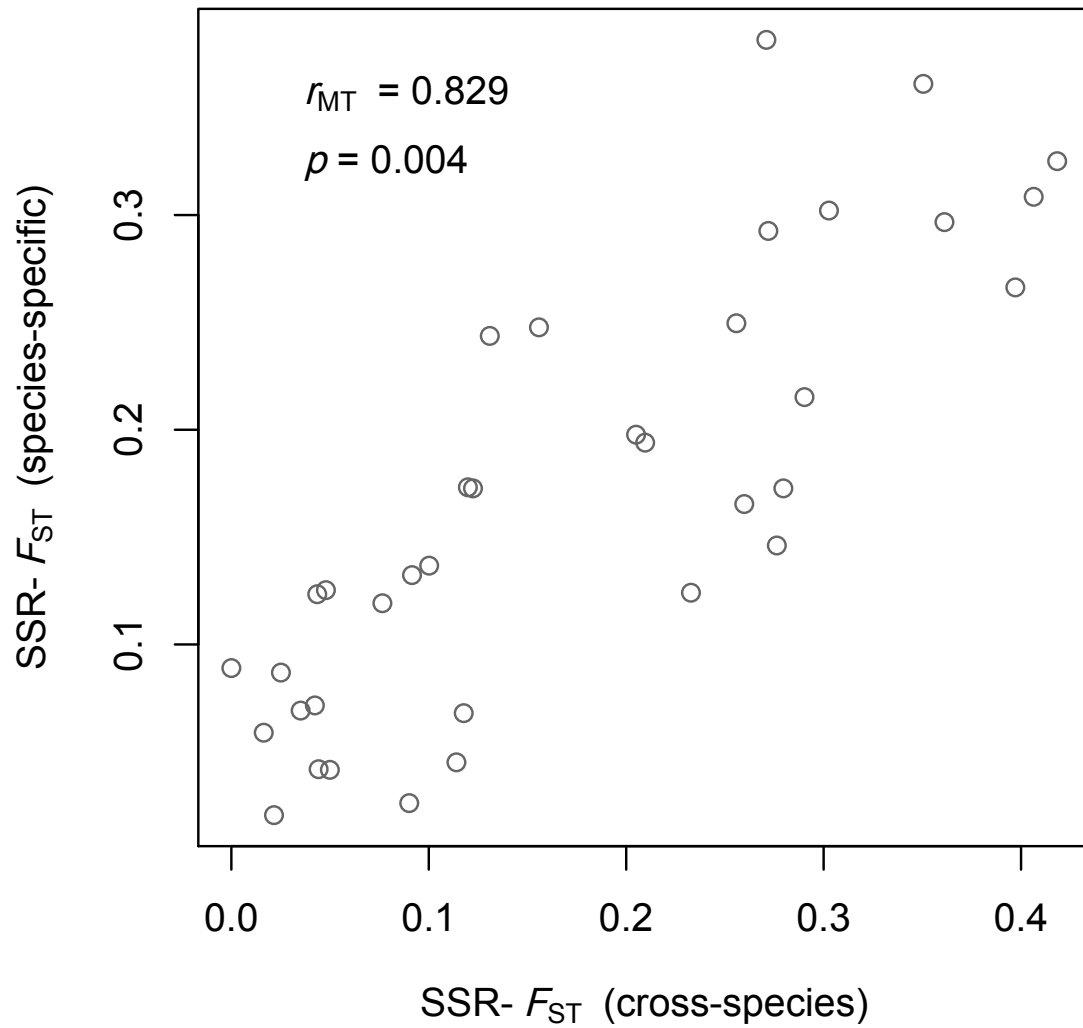

**Additional file 10: Figure S6** Comparison of pairwise population genetic differentiation ( $F_{ST}$ ) among nine populations of *Arabidopsis halleri* based on 12 cross-species microsatellite markers and seven species-specific microsatellite markers.  $r_{MT}$  represents the correlation coefficient of the Mantel test and  $p$  the significance of the correlation.
